# Supplementary material for: RNA-Seq Transcriptome Analysis and Evolution of OsEBS, a Gene Involved in Enhanced Spikelet Number per Panicle in Rice
Source: MDPI journal article supplement (doi:10.3390/ijms241210303), 2023-06-18
Supplement: s1 [file s1]

**Table S1.** Statistical table for mapping rate of samples.

| <b>Library</b> | <b>B1021</b> | <b>B1022</b> | <b>B1023</b> | <b>G21</b> | <b>G22</b> | <b>G23</b> |
|----------------|--------------|--------------|--------------|------------|------------|------------|
| Total Reads    | 40,652,450   | 45,029,452   | 46,814,038   | 39,480,362 | 44,404,198 | 38,709,036 |
| Mapped Reads   | 35,415,808   | 38,796,427   | 40,559,649   | 33,835,636 | 38,465,065 | 33,483,682 |
| Mapping Rate   | 0.8712       | 0.8616       | 0.8664       | 0.8570     | 0.8662     | 0.8650     |
| UnMapped Reads | 5,236,642    | 6,233,025    | 6,254,389    | 5,644,726  | 5,939,133  | 5,225,354  |
| MultiMap Reads | 939,802      | 1,026,897    | 1,043,893    | 795,564    | 982,602    | 879,232    |
| MultiMap Rate  | 0.0231       | 0.0228       | 0.0223       | 0.0202     | 0.0221     | 0.0227     |

**Table S2.** Analysis of DEGs between different materials.

| <b>Name</b> | <b>B1021_G21</b> | <b>B1021_G22</b> | <b>B1022_G21</b> | <b>B1022_G22</b> | <b>B1022_G23</b> | <b>B1023_G21</b> | <b>B1023_G22</b> | <b>B1023_G23</b> | <b>B_G</b> |
|-------------|------------------|------------------|------------------|------------------|------------------|------------------|------------------|------------------|------------|
| Up          | 1,507            | 1,549            | 1,484            | 1,615            | 1,602            | 1,451            | 1,637            | 1,721            | 1,204      |
| Down        | 5,435            | 5,201            | 5,062            | 4,921            | 4,367            | 4,775            | 4,614            | 4,149            | 4,165      |
| Total       | 6,942            | 6,750            | 6,546            | 6,536            | 5,969            | 6,226            | 6,251            | 5,870            | 5,369      |

**Table S3.** DEGs related to rice auxin regulation in rice.

|                     | Gene            | Fold Change  | q Value       | Putative Function                                      |
|---------------------|-----------------|--------------|---------------|--------------------------------------------------------|
| Up regulated DEGs   | OsZS_11G0101800 | 1.68         | 0.0001        | F-box/LRR-repeat protein 13                            |
|                     | OsZS_11G0039500 | 1.66         | 0.0000        | Probable auxin efflux carrier component 1b             |
|                     | OsZS_06G0600900 | 1.53         | 0.0000        | Molybdenum cofactor sulfurase                          |
|                     | OsZS_12G0038200 | 1.46         | 0.0000        | Probable auxin efflux carrier component 1d             |
|                     | OsZS_02G0541900 | 1.46         | 0.0398        | VAN3-binding protein                                   |
|                     | OsZS_05G0060500 | 1.45         | 0.0000        | ABC transporter B family member 11                     |
|                     | OsZS_11G0101900 | 1.35         | 0.0000        | F-box/LRR-repeat protein At4g14096                     |
|                     | OsZS_04G0788300 | 1.22         | 0.0000        | Auxin response factor 11                               |
|                     | OsZS_06G0098700 | 1.17         | 0.0000        | BTB/POZ domain-containing protein NPY1                 |
|                     | OsZS_05G0580100 | 1.16         | 0.0000        | Auxin response factor 15                               |
|                     | OsZS_04G0788200 | 1.11         | 0.0027        | Auxin response factor 11                               |
|                     | OsZS_04G0769600 | 1.02         | 0.0000        | ABC transporter B family member 19                     |
|                     | OsZS_05G0540900 | 1.01         | 0.0000        | Auxin response factor 14                               |
|                     | OsZS_10G0056400 | 1.00         | 0.0000        | Auxin transporter-like protein 3                       |
| Down regulated DEGs | —               |              |               |                                                        |
|                     | OsZS_01G0558800 | <b>-5.06</b> | <b>0.0000</b> | <b>ABC transporter B family member 4</b>               |
|                     | OsZS_05G0165300 | -4.65        | 0.0000        | CASP-like protein BLE3                                 |
|                     | OsZS_03G0652400 | -4.29        | 0.0000        | Transcription factor MYB44                             |
|                     | OsZS_12G0491700 | -3.90        | 0.0000        | NAC domain-containing protein 21/22                    |
|                     | OsZS_05G0603900 | -3.62        | 0.0000        | Bidirectional sugar transporter SWEET5                 |
|                     | OsZS_11G0101400 | -3.60        | 0.0000        | Transcription factor MYB44                             |
|                     | OsZS_12G0037400 | -3.49        | 0.0000        | Protein ZINC INDUCED FACILITATOR-LIKE 1                |
|                     | OsZS_02G0022000 | -3.40        | 0.0000        | Protein WALLS ARE THIN 1                               |
|                     | OsZS_02G0071100 | -3.33        | 0.0000        | NAC domain-containing protein 21/22                    |
|                     | OsZS_02G0112100 | -3.30        | 0.0000        | Subtilisin-like protease SBT5.3                        |
|                     | OsZS_06G0580300 | -2.89        | 0.0000        | AP2-like ethylene-responsive transcription factor AIL5 |
|                     | OsZS_09G0018600 | -2.81        | 0.0000        | Transcription factor MYB44                             |
|                     | OsZS_04G0586500 | -2.60        | 0.0000        | 2-oxoglutarate-dependent dioxygenase DAO               |
|                     | OsZS_06G0612500 | -2.57        | 0.0000        | NAC domain-containing protein 21/22                    |
|                     | OsZS_02G0702000 | -2.48        | 0.0000        | NAC domain-containing protein 21/22                    |
|                     | OsZS_03G0012400 | -2.42        | 0.0003        | Cortical cell-delineating protein                      |
|                     | OsZS_12G0491200 | -2.41        | 0.0001        | Transcription factor PIF4                              |
|                     | OsZS_12G0037500 | -2.33        | 0.0004        | Protein ZINC INDUCED FACILITATOR-LIKE 1                |
|                     | OsZS_03G0734600 | -2.31        | 0.0005        | Probable aldehyde oxidase 2                            |
|                     | OsZS_03G0734400 | -2.25        | 0.0000        | Probable aldehyde oxidase 2                            |
|                     | OsZS_02G0463000 | -2.18        | 0.0011        | 2-oxoglutarate-dependent dioxygenase DAO               |
|                     | OsZS_04G0052300 | -2.13        | 0.0000        | Probable indole-3-pyruvate monooxygenase <b>YUCCA3</b> |
|                     | OsZS_10G0401000 | -2.04        | 0.0000        | Auxin-responsive protein SAUR32                        |
|                     | OsZS_01G0195900 | -1.99        | 0.0000        | Auxin-responsive protein <b>IAA4</b>                   |
|                     | OsZS_11G0050900 | -1.97        | 0.0000        | Serine/threonine-protein kinase D6PKL2                 |
|                     | OsZS_03G0012200 | -1.78        | 0.0002        | Protein NRT1/ PTR FAMILY 6.3                           |
|                     | OsZS_07G0096400 | -1.78        | 0.0099        | Putative auxin response factor 20                      |
|                     | OsZS_06G0563500 | -1.75        | 0.0000        | Transcription factor MYB44                             |
|                     | OsZS_04G0779200 | -1.74        | 0.0089        | Auxin-responsive protein IAA33                         |

|                 |       |        |                                                         |
|-----------------|-------|--------|---------------------------------------------------------|
| OsZS_05G0063000 | -1.73 | 0.0136 | Pyrophosphate-energized vacuolar membrane proton pump 1 |
| OsZS_11G0039000 | -1.71 | 0.0132 | Protein ZINC INDUCED FACILITATOR-LIKE 1                 |
| OsZS_02G0100900 | -1.71 | 0.0000 | Transcription factor MYB44                              |
| OsZS_04G0647200 | -1.63 | 0.0196 | Auxin-responsive protein SAUR36                         |
| OsZS_06G0631400 | -1.59 | 0.0000 | Xyloglucan endotransglucosylase/hydrolase protein 22    |
| OsZS_06G0047000 | -1.57 | 0.0000 | Auxin-responsive protein SAUR50                         |
| OsZS_05G0051600 | -1.52 | 0.0021 | Probable indole-3-acetic acid-amido synthetase GH3.6    |
| OsZS_01G0643700 | -1.52 | 0.0000 | NAD(P)H dehydrogenase (quinone) FQR1                    |
| OsZS_09G0415200 | -1.51 | 0.0000 | Protein PIN-LIKES 7                                     |
| OsZS_01G0566600 | -1.51 | 0.0060 | Cullin-1                                                |
| OsZS_01G0791800 | -1.50 | 0.0127 | Probable glutathione S-transferase                      |
| OsZS_03G0542100 | -1.46 | 0.0305 | ARF guanine-nucleotide exchange factor GNOM             |
| OsZS_08G0637000 | -1.41 | 0.0000 | Auxin-responsive protein SAUR36                         |
| OsZS_01G0198600 | -1.41 | 0.0000 | ABC transporter B family member 21                      |
| OsZS_02G0609900 | -1.38 | 0.0000 | Auxin-responsive protein IAA8                           |
| OsZS_01G0644100 | -1.37 | 0.0000 | Probable indole-3-acetic acid-amido synthetase GH3.1    |
| OsZS_09G0304900 | -1.35 | 0.0292 | Auxin-responsive protein SAUR50                         |
| OsZS_02G0281400 | -1.32 | 0.0000 | Auxin-responsive protein SAUR50                         |
| OsZS_02G0657200 | -1.27 | 0.0061 | Auxin-responsive protein SAUR32                         |
| OsZS_08G0010700 | -1.26 | 0.0070 | NAC domain-containing protein 30                        |
|                 |       |        | Trifunctional UDP-glucose                               |
| OsZS_03G0171700 | -1.26 | 0.0000 | 4,6-dehydratase/UDP-4-keto-6-deoxy-D-glucose            |
|                 |       |        | 3,5-epimerase/UDP-4-keto-L-rhamnose-reductase           |
|                 |       |        | RHM1                                                    |
| OsZS_08G0655500 | -1.25 | 0.0030 | ABC transporter B family member 1                       |
| OsZS_03G0073600 | -1.23 | 0.0003 | Protein BIG GRAIN 1                                     |
| OsZS_11G0065400 | -1.21 | 0.0000 | Putative auxin transporter-like protein 4               |
| OsZS_04G0632900 | -1.15 | 0.0000 | Auxin response factor 10                                |
| OsZS_03G0563800 | -1.14 | 0.0000 | Type IV inositol polyphosphate 5-phosphatase 11         |
| OsZS_02G0351400 | -1.14 | 0.0000 | Flavonoid 3'-monooxygenase                              |
| OsZS_01G0183100 | -1.11 | 0.0482 | Probable indole-3-pyruvate monooxygenase YUCCA10        |
| OsZS_03G0567700 | -1.11 | 0.0050 | Auxin-responsive protein IAA12                          |
| OsZS_11G0549000 | -1.07 | 0.0000 | Glycine-rich domain-containing protein 2                |
| OsZS_05G0046000 | -1.06 | 0.0000 | ABC transporter B family member 4                       |
| OsZS_07G0491000 | -1.06 | 0.0020 | Probable indole-3-acetic acid-amido synthetase GH3.8    |
| OsZS_05G0549100 | -1.05 | 0.0000 | Auxin-responsive protein IAA18                          |
| OsZS_06G0521900 | -1.02 | 0.0283 | Auxin-responsive protein IAA23                          |

---

**Table S4.** Enriched KEGG metabolic pathways (Top 30).

| Number | Name                                                   | q Value | Up_<br>Count | Down_<br>Count | Down DEGs related<br>to auxin regulation                |
|--------|--------------------------------------------------------|---------|--------------|----------------|---------------------------------------------------------|
| 1      | Phenylpropanoid biosynthesis                           | 0.0000  | 2            | 67             |                                                         |
| 2      | Cutin, suberine and wax biosynthesis                   | 0.0003  | 1            | 22             |                                                         |
| 3      | Cyanoamino acid metabolism                             | 0.0027  | 0            | 13             |                                                         |
| 4      | Photosynthesis - antenna proteins                      | 0.0113  | 0            | 7              |                                                         |
| 5      | Glutathione metabolism                                 | 0.0136  | 1            | 25             |                                                         |
| 6      | alpha-Linolenic acid metabolism                        | 0.0261  | 0            | 14             |                                                         |
| 7      | Valine, leucine and isoleucine degradation             | 0.0301  | 1            | 14             |                                                         |
| 8      | Amino sugar and nucleotide sugar metabolism            | 0.0333  | 1            | 33             | OsZS_03G0171700                                         |
| 9      | Pentose and glucuronate interconversions               | 0.0333  | 0            | 14             |                                                         |
| 10     | Photosynthesis                                         | 0.0396  | 0            | 14             |                                                         |
| 11     | Flavonoid biosynthesis                                 | 0.0499  | 0            | 9              | OsZS_02G0351400                                         |
| 12     | Tropane, piperidine and pyridine alkaloid biosynthesis | 0.0523  | 0            | 7              |                                                         |
| 13     | Fatty acid elongation                                  | 0.0780  | 1            | 13             |                                                         |
| 14     | MAPK signaling pathway - plant                         | 0.0780  | 5            | 28             |                                                         |
| 15     | Mannose type O-glycan biosynthesis                     | 0.1243  | 0            | 4              |                                                         |
| 16     | Phenylalanine metabolism                               | 0.1243  | 1            | 8              |                                                         |
| 17     | Ascorbate and aldarate metabolism                      | 0.1273  | 0            | 11             |                                                         |
| 18     | Starch and sucrose metabolism                          | 0.1273  | 5            | 24             |                                                         |
| 19     | beta-Alanine metabolism                                | 0.1273  | 0            | 10             |                                                         |
| 20     | Anthocyanin biosynthesis                               | 0.2509  | 0            | 7              |                                                         |
| 21     | Stilbenoid, diarylheptanoid and gingerol biosynthesis  | 0.2571  | 0            | 6              |                                                         |
| 22     | Tyrosine metabolism                                    | 0.3849  | 0            | 6              |                                                         |
| 23     | Homologous recombination                               | 0.3849  | 18           | 1              |                                                         |
| 24     | Fatty acid degradation                                 | 0.3849  | 0            | 10             |                                                         |
| 25     | Benzoxazinoid biosynthesis                             | 0.3994  | 0            | 5              | OsZS_01G0558800;<br>OsZS_08G0655500;O<br>sZS_05G0046000 |
| 26     | ABC transporters                                       | 0.3994  | 3            | 5              |                                                         |
| 27     | Plant-pathogen interaction                             | 0.3994  | 7            | 50             |                                                         |
| 28     | Pyrimidine metabolism                                  | 0.4010  | 14           | 10             |                                                         |
| 29     | Carbon fixation in photosynthetic organisms            | 0.4129  | 0            | 13             |                                                         |
| 30     | Phenylalanine, tyrosine and tryptophan biosynthesis    | 0.4686  | 1            | 10             |                                                         |

**Table S5.** Distribution of *OsEBS* full-length and deletion allele types in indica, japonica and wild rice.

| Accessions | Variety           | Species | <i>OsEBS</i> gene type |
|------------|-------------------|---------|------------------------|
| 1          | TR24              | indica  | Full-length            |
| 2          | Baxihandao        | indica  | Full-length            |
| 3          | Ezao18            | indica  | Full-length            |
| 4          | Haixianxiang5hao  | indica  | Full-length            |
| 5          | Huhan15hao        | indica  | Full-length            |
| 6          | Jiayu293          | indica  | Full-length            |
| 7          | Jinzao47          | indica  | Full-length            |
| 8          | Taiyoujingzhan    | indica  | Full-length            |
| 9          | TianfengB         | indica  | Full-length            |
| 10         | Wuyouyuehesimiao  | indica  | Full-length            |
| 11         | Zhonghui8015      | indica  | Full-length            |
| 12         | Zhongjian100      | indica  | Full-length            |
| 13         | Zhongzao39        | indica  | Full-length            |
| 14         | ZhongzheB         | indica  | Full-length            |
| 15         | Arias             | indica  | Truncated              |
| 16         | Dhala             | indica  | Truncated              |
| 17         | Dholi Boro        | indica  | Truncated              |
| 18         | DV1               | indica  | Truncated              |
| 19         | DV85              | indica  | Truncated              |
| 20         | Fan31             | indica  | Truncated              |
| 21         | Fan32             | indica  | Truncated              |
| 22         | Fan38             | indica  | Truncated              |
| 23         | Fan39             | indica  | Truncated              |
| 24         | Francis           | indica  | Truncated              |
| 25         | IR64              | indica  | Truncated              |
| 26         | Jupiter           | indica  | Truncated              |
| 27         | KU115             | indica  | Truncated              |
| 28         | Mansaku           | indica  | Truncated              |
| 29         | N22               | indica  | Truncated              |
| 30         | Padi Boenor       | indica  | Truncated              |
| 31         | shada Boro        | indica  | Truncated              |
| 32         | Shuo1             | indica  | Truncated              |
| 33         | <b>T1</b>         | indica  | Truncated              |
| 34         | Taducan           | indica  | Truncated              |
| 35         | weus/Rordo        | indica  | Truncated              |
| 36         | Baguixiang        | indica  | Truncated              |
| 37         | Beijingjiangminuo | indica  | Truncated              |
| 38         | Fuhui838          | indica  | Truncated              |
| 39         | Guangtoughulu     | indica  | Truncated              |
| 40         | Hongnuo822        | indica  | Truncated              |
| 41         | Jiuyuehuang       | indica  | Truncated              |
| 42         | Keyuanyou610      | indica  | Truncated              |
| 43         | Liushizao         | indica  | Truncated              |
| 44         | Lucaihao          | indica  | Truncated              |
| 45         | Neixiang5B        | indica  | Truncated              |
| 46         | Qiuqianbai        | indica  | Truncated              |

|    |              |          |             |
|----|--------------|----------|-------------|
| 47 | Sanbaili     | indica   | Truncated   |
| 48 | Shundetangmu | indica   | Truncated   |
| 49 | Taidongludao | indica   | Truncated   |
| 50 | XieB         | indica   | Truncated   |
| 51 | Yudao1hao    | indica   | Truncated   |
| 52 | Zaoyouzhan   | indica   | Truncated   |
| 53 | Zhong9B      | indica   | Truncated   |
| 54 | Zhongzao22   | indica   | Truncated   |
| 55 | Zhouandao    | indica   | Truncated   |
| 56 | 489S         | japonica | Full-length |
| 57 | 77B          | japonica | Full-length |
| 58 | 8527B        | japonica | Full-length |
| 59 | 9520B        | japonica | Full-length |
| 60 | 98101B       | japonica | Full-length |
| 61 | AB21         | japonica | Full-length |
| 62 | Fan1         | japonica | Full-length |
| 63 | Fan10        | japonica | Full-length |
| 64 | Fan11        | japonica | Full-length |
| 65 | Fan12        | japonica | Full-length |
| 66 | Fan13        | japonica | Full-length |
| 67 | Fan14        | japonica | Full-length |
| 68 | Fan16        | japonica | Full-length |
| 69 | Fan17        | japonica | Full-length |
| 70 | Fan21        | japonica | Full-length |
| 71 | Fan24        | japonica | Full-length |
| 72 | Fan25        | japonica | Full-length |
| 73 | Fan26        | japonica | Full-length |
| 74 | Fan29        | japonica | Full-length |
| 75 | Fan3         | japonica | Full-length |
| 76 | Fan33        | japonica | Full-length |
| 77 | Fan34        | japonica | Full-length |
| 78 | Fan35        | japonica | Full-length |
| 79 | Fan36        | japonica | Full-length |
| 80 | Fan37        | japonica | Full-length |
| 81 | Fan4         | japonica | Full-length |
| 82 | Fan40        | japonica | Full-length |
| 83 | Fan41        | japonica | Full-length |
| 84 | Fan42        | japonica | Full-length |
| 85 | Fan43        | japonica | Full-length |
| 86 | Fan6         | japonica | Full-length |
| 87 | Fan7         | japonica | Full-length |
| 88 | Fan9         | japonica | Full-length |
| 89 | Ru0801030    | japonica | Full-length |
| 90 | Ru1001102    | japonica | Full-length |
| 91 | T65          | japonica | Full-length |
| 92 | Tainan       | japonica | Full-length |
| 93 | W6599        | japonica | Full-length |
| 94 | W96B         | japonica | Full-length |
| 95 | WDR129       | japonica | Full-length |

|     |                    |          |             |
|-----|--------------------|----------|-------------|
| 96  | Baonong34          | japonica | Full-length |
| 97  | DanK9B             | japonica | Full-length |
| 98  | Dongbeizaodao      | japonica | Full-length |
| 99  | Feidongtangdao     | japonica | Full-length |
| 100 | FengJin            | japonica | Full-length |
| 101 | Ganningjing1hao    | japonica | Full-length |
| 102 | HanfengB           | japonica | Full-length |
| 103 | Huhan106           | japonica | Full-length |
| 104 | Huhan3hao          | japonica | Full-length |
| 105 | Huruan1212         | japonica | Full-length |
| 106 | Huayu1hao          | japonica | Full-length |
| 107 | Jijing88           | japonica | Full-length |
| 108 | Jia58              | japonica | Full-length |
| 109 | Jindao106          | japonica | Full-length |
| 110 | Jingyue1hao        | japonica | Full-length |
| 111 | Kongyu131          | japonica | Full-length |
| 112 | Lianjing4hao       | japonica | Full-length |
| 113 | Liaoyan294         | japonica | Full-length |
| 114 | Longdao203         | japonica | Full-length |
| 115 | Longjing680        | japonica | Full-length |
| 116 | Nanjing44          | japonica | Full-length |
| 117 | Nanjing9108        | japonica | Full-length |
| 118 | Ninghui8hao        | japonica | Full-length |
| 119 | Ningjing3hao       | japonica | Full-length |
| 120 | Ningjing7hao       | japonica | Full-length |
| 121 | Nongkan57          | japonica | Full-length |
| 122 | Pujing223          | japonica | Full-length |
| 123 | Qianjingxiangnuo   | japonica | Full-length |
| 124 | QingchangB         | japonica | Full-length |
| 125 | Qingxianggruannuo  | japonica | Full-length |
| 126 | qiuguang           | japonica | Full-length |
| 127 | Qiutianxiaoding    | japonica | Full-length |
| 128 | Shen21B            | japonica | Full-length |
| 129 | Shennong9741       | japonica | Full-length |
| 130 | Sidao16hao         | japonica | Full-length |
| 131 | Song5513B          | japonica | Full-length |
| 132 | Songjing22         | japonica | Full-length |
| 133 | Songjing9hao       | japonica | Full-length |
| 134 | Songnuo2hao        | japonica | Full-length |
| 135 | Songxiangjing11855 | japonica | Full-length |
| 136 | Songnian1hao       | japonica | Full-length |
| 137 | Songnian3hao       | japonica | Full-length |
| 138 | Tianlong104        | japonica | Full-length |
| 139 | Tianlong660        | japonica | Full-length |
| 140 | Wu1B               | japonica | Full-length |
| 141 | Wuyujing7hao       | japonica | Full-length |
| 142 | Wuyujing23         | japonica | Full-length |
| 143 | Wuyujing27         | japonica | Full-length |
| 144 | Xin600S            | japonica | Full-length |

|     |                 |                    |             |
|-----|-----------------|--------------------|-------------|
| 145 | Xu32075         | japonica           | Full-length |
| 146 | XienuoB         | japonica           | Full-length |
| 147 | Yangjing3491    | japonica           | Full-length |
| 148 | Yangjing7035    | japonica           | Full-length |
| 149 | Yangjingnuo2hao | japonica           | Full-length |
| 150 | Yejinghui       | japonica           | Full-length |
| 151 | Yingguang       | japonica           | Full-length |
| 152 | Yinyexuanfei    | japonica           | Full-length |
| 153 | Yushuxiang      | japonica           | Full-length |
| 154 | Yunguang104     | japonica           | Full-length |
| 155 | Yunjingyou12hao | japonica           | Full-length |
| 156 | Yunjingyou15hao | japonica           | Full-length |
| 157 | Yunjingyou17hao | japonica           | Full-length |
| 158 | Zao98110        | japonica           | Full-length |
| 159 | Zhendao88       | japonica           | Full-length |
| 160 | Zhenxiang24     | japonica           | Full-length |
| 161 | BJ1             | japonica           | Truncated   |
| 162 | Fan2            | japonica           | Truncated   |
| 163 | Daohuaxiang2hao | japonica           | Truncated   |
| 164 | Huhan7hao       | japonica           | Truncated   |
| 165 | Ning5047        | japonica           | Truncated   |
| 166 | Xiushui110      | japonica           | Truncated   |
| 167 | Yangjing4308    | japonica           | Truncated   |
| 168 | Zhongdan4hao    | japonica           | Truncated   |
| 169 | Heimangdao      | japonica           | Full-length |
| 170 | Yeshengdao363   | <i>O.rufipogon</i> | Truncated   |
| 171 | Yeshengdao455   | <i>O.rufipogon</i> | Truncated   |
| 172 | Yeshengdao465   | <i>O.rufipogon</i> | Truncated   |
| 173 | Yeshengdao488   | <i>O.rufipogon</i> | Truncated   |
| 174 | Nov-93          | indica             | Truncated   |
| 175 | 187R            | indica             | Truncated   |
| 176 | 8INDESHWARI     | indica             | Truncated   |
| 177 | ADT(R)48        | indica             | Truncated   |
| 178 | AG7             | indica             | Truncated   |
| 179 | AS 996-1K       | indica             | Truncated   |
| 180 | Bo B            | indica             | Truncated   |
| 181 | CIMELATI        | indica             | Truncated   |
| 182 | CT 15672        | indica             | Truncated   |
| 183 | CT 15691        | indica             | Truncated   |
| 184 | CT 15765        | indica             | Truncated   |
| 185 | CT 18232        | indica             | Truncated   |
| 186 | CT 18233        | indica             | Truncated   |
| 187 | CT 18243        | indica             | Truncated   |
| 188 | CT 18372        | indica             | Truncated   |
| 189 | CT 18375        | indica             | Truncated   |
| 190 | CT 18597        | indica             | Truncated   |
| 191 | CT 18599        | indica             | Truncated   |
| 192 | CT 18620        | indica             | Truncated   |
| 193 | CT 18657        | indica             | Truncated   |



|     |           |        |           |
|-----|-----------|--------|-----------|
| 194 | CT 18667  | indica | Truncated |
| 195 | CT 18685  | indica | Truncated |
| 196 | CT 19561  | indica | Truncated |
| 197 | CT I8148  | indica | Truncated |
| 198 | Dalidao   | indica | Truncated |
| 199 | Dular     | indica | Truncated |
| 200 | Guichao 2 | indica | Truncated |
| 201 | Hui9B     | indica | Truncated |
| 202 | IR 01N223 | indica | Truncated |
| 203 | IR 04N114 | indica | Truncated |
| 204 | IR 09A228 | indica | Truncated |
| 205 | IR 19661  | indica | Truncated |
| 206 | IR 19746  | indica | Truncated |
| 207 | IR 54751  | indica | Truncated |
| 208 | IR 63896  | indica | Truncated |
| 209 | IR 65482  | indica | Truncated |
| 210 | IR 65483  | indica | Truncated |
| 211 | IR 65620  | indica | Truncated |
| 212 | IR 68450  | indica | Truncated |
| 213 | IR 70175  | indica | Truncated |
| 214 | IR 71033  | indica | Truncated |
| 215 | IR 71146  | indica | Truncated |
| 216 | IR 71701  | indica | Truncated |
| 217 | IR 72158  | indica | Truncated |
| 218 | IR 72870  | indica | Truncated |
| 219 | IR 73546  | indica | Truncated |
| 220 | IR 73707  | indica | Truncated |
| 221 | IR 73718  | indica | Truncated |
| 222 | IR 74284  | indica | Truncated |
| 223 | IR 75870  | indica | Truncated |
| 224 | IR 76479  | indica | Truncated |
| 225 | IR 77298  | indica | Truncated |
| 226 | IR 77674  | indica | Truncated |
| 227 | IR 77736  | indica | Truncated |
| 228 | IR 78091  | indica | Truncated |
| 229 | IR 78101  | indica | Truncated |
| 230 | IR 78545  | indica | Truncated |
| 231 | IR 78875  | indica | Truncated |
| 232 | IR 78877  | indica | Truncated |
| 233 | IR 78914  | indica | Truncated |
| 234 | IR 79482  | indica | Truncated |
| 235 | IR 79525  | indica | Truncated |
| 236 | IR 79532  | indica | Truncated |
| 237 | IR 79584  | indica | Truncated |
| 238 | IR 79637  | indica | Truncated |
| 239 | IR 79913  | indica | Truncated |
| 240 | IR 80312  | indica | Truncated |
| 241 | IR 80314  | indica | Truncated |
| 242 | IR 80315  | indica | Truncated |

|     |                |          |             |
|-----|----------------|----------|-------------|
| 243 | IR 80404       | indica   | Truncated   |
| 244 | IR 80655       | indica   | Truncated   |
| 245 | IR 80692       | indica   | Truncated   |
| 246 | IR 80694       | indica   | Truncated   |
| 247 | IR 80707       | indica   | Truncated   |
| 248 | IR 80922       | indica   | Truncated   |
| 249 | IR 81336       | indica   | Truncated   |
| 250 | IR 81423       | indica   | Truncated   |
| 251 | IR 82098       | indica   | Truncated   |
| 252 | IR 83222       | indica   | Truncated   |
| 253 | IR 84233       | indica   | Truncated   |
| 254 | IRRI 134       | indica   | Truncated   |
| 255 | Liantangzao 3  | indica   | Truncated   |
| 256 | IR 79253       | indica   | Truncated   |
| 257 | Luzhan 7       | indica   | Truncated   |
| 258 | Minghui 63     | indica   | Truncated   |
| 259 | Nanjing 16     | indica   | Truncated   |
| 260 | NEAMAT         | indica   | Truncated   |
| 261 | OM 5338        | indica   | Truncated   |
| 262 | OM 576         | indica   | Truncated   |
| 263 | OM 6073        | indica   | Truncated   |
| 264 | OM 6378        | indica   | Truncated   |
| 265 | OM 7938        | indica   | Truncated   |
| 266 | OMCS 2009      | indica   | Truncated   |
| 267 | Peiai64        | indica   | Truncated   |
| 268 | PR 26703       | indica   | Truncated   |
| 269 | RADHA4         | indica   | Truncated   |
| 270 | S 3429         | indica   | Truncated   |
| 271 | Teqing2        | indica   | Truncated   |
| 272 | UPR 84-21      | indica   | Truncated   |
| 273 | XiangaiB       | indica   | Truncated   |
| 274 | XieqingzaoB    | indica   | Truncated   |
| 275 | YuefengB       | indica   | Truncated   |
| 276 | IR 70213       | indica   | Full-length |
| 277 | IR 72768       | indica   | Full-length |
| 278 | IR 80098       | indica   | Full-length |
| 279 | IR 82127       | indica   | Full-length |
| 280 | IR 82228       | indica   | Full-length |
| 281 | IRBB           | indica   | Full-length |
| 282 | OM 5628        | indica   | Full-length |
| 283 | Yuedongdao     | indica   | Full-length |
| 284 | Zaozhenzhu     | indica   | Full-length |
| 285 | 80A90YR72      | indica   | Full-length |
| 286 | CB06-505       | japonica | Truncated   |
| 287 | 2428           | japonica | Truncated   |
| 288 | IR 83245       | japonica | Full-length |
| 289 | IR 83265       | japonica | Full-length |
| 290 | AnnongwanjingB | japonica | Full-length |
| 291 | C418           | japonica | Full-length |

|     |                     |                    |             |
|-----|---------------------|--------------------|-------------|
| 292 | CW23                | japonica           | Full-length |
| 293 | Dongjin             | japonica           | Full-length |
| 294 | G2 948              | japonica           | Full-length |
| 295 | GZ 7712             | japonica           | Full-length |
| 296 | Hexi 15             | japonica           | Full-length |
| 297 | Hwayoung            | japonica           | Full-length |
| 298 | IRBL                | japonica           | Full-length |
| 299 | ITAI48              | japonica           | Full-length |
| 300 | Jingjing 7          | japonica           | Full-length |
| 301 | JODO                | japonica           | Full-length |
| 302 | Kunjing 4           | japonica           | Full-length |
| 303 | Lijiangxintuanheigu | japonica           | Full-length |
| 304 | IRAT4               | japonica           | Full-length |
| 305 | Niangaodao          | japonica           | Full-length |
| 306 | Ningjing 37         | japonica           | Full-length |
| 307 | nipponbare          | japonica           | Full-length |
| 308 | OLBYE 2             | japonica           | Full-length |
| 309 | ORO                 | japonica           | Full-length |
| 310 | Shennong 265        | japonica           | Full-length |
| 311 | Taichung65          | japonica           | Full-length |
| 312 | Wuyugeng 3          | japonica           | Full-length |
| 313 | Xinzhunuo 4         | japonica           | Full-length |
| 314 | Yueguang            | japonica           | Full-length |
| 315 | YUNLEN              | japonica           | Full-length |
| 316 | Zhonghua 11         | japonica           | Full-length |
| 317 | 0.alater wild rice  | <i>o.rufipogon</i> | Truncated   |
| 318 | Jinghong wild rice  | <i>o.rufipogon</i> | Truncated   |
| 319 | Miandian wild rice  | <i>o.rufipogon</i> | Truncated   |
| 320 | Taiwan wild rice    | <i>o.rufipogon</i> | Truncated   |
| 321 | YD2-0225            | <i>O.rufipogon</i> | Truncated   |
| 322 | YD2-0233            | <i>O.rufipogon</i> | Truncated   |
| 323 | YD2-0239            | <i>O.rufipogon</i> | Truncated   |
| 324 | YD2-0241            | <i>O.rufipogon</i> | Truncated   |
| 325 | YD2-0245            | <i>O.rufipogon</i> | Truncated   |
| 326 | YD2-0344            | <i>O.rufipogon</i> | Truncated   |
| 327 | YD2-0356            | <i>O.rufipogon</i> | Truncated   |
| 328 | YD2-0366            | <i>O.rufipogon</i> | Truncated   |
| 329 | YD2-0368            | <i>O.rufipogon</i> | Truncated   |
| 330 | YD2-0772            | <i>O.rufipogon</i> | Truncated   |
| 331 | YD2-0267            | <i>O.rufipogon</i> | Truncated   |
| 332 | YD2-0275            | <i>O.rufipogon</i> | Truncated   |
| 333 | YD2-0277            | <i>O.rufipogon</i> | Truncated   |
| 334 | YD2-0782            | <i>O.rufipogon</i> | Truncated   |
| 335 | Dongxiang wild rice | <i>O.rufipogon</i> | Full-length |
| 336 | YD2-0069            | <i>O.rufipogon</i> | Full-length |
| 337 | YD2-0975            | <i>O.rufipogon</i> | Full-length |
| 338 | YD2-0645            | <i>O.rufipogon</i> | Full-length |
| 339 | YD2-0860            | <i>O.rufipogon</i> | Full-length |
| 340 | YD4-24              | <i>O.rufipogon</i> | Full-length |

|     |            |                    |             |
|-----|------------|--------------------|-------------|
| 341 | YD4-52     | <i>O.rufipogon</i> | Full-length |
| 342 | YD4-65     | <i>O.rufipogon</i> | Full-length |
| 343 | YD4-127    | <i>O.rufipogon</i> | Full-length |
| 344 | YD4-191    | <i>O.rufipogon</i> | Full-length |
| 345 | YD4-197    | <i>O.rufipogon</i> | Full-length |
| 346 | YD4-133    | <i>O.rufipogon</i> | Full-length |
| 347 | IRGC100189 | <i>O.rufipogon</i> | Full-length |
| 348 | IRGC100208 | <i>O.rufipogon</i> | Full-length |
| 349 | IRGC10211  | <i>O.rufipogon</i> | Full-length |
| 350 | IRGC100588 | <i>O.rufipogon</i> | Full-length |
| 351 | IRGC100599 | <i>O.rufipogon</i> | Full-length |
| 352 | IRGC100904 | <i>O.rufipogon</i> | Full-length |
| 353 | IRGC100920 | <i>O.rufipogon</i> | Full-length |
| 354 | IRGC100923 | <i>O.rufipogon</i> | Full-length |
| 355 | IRGC100926 | <i>O.rufipogon</i> | Full-length |
| 356 | IRGC103822 | <i>O.rufipogon</i> | Full-length |
| 357 | IRGC103850 | <i>O.rufipogon</i> | Full-length |
| 358 | IRGC103884 | <i>O.rufipogon</i> | Full-length |
| 359 | IRGC100195 | <i>O.NIVARA</i>    | Truncated   |
| 360 | IRGC100196 | <i>O.NIVARA</i>    | Truncated   |
| 361 | IRGC100897 | <i>O.NIVARA</i>    | Truncated   |
| 362 | IRGC100898 | <i>O.NIVARA</i>    | Full-length |

---

“Truncated” means that the protein in this variety was domain-loss like that in Guichao2;

“Full-lenght” means that the protein in this variety was full size like that in B102;

Accessions 174-362 are cited from the literature(Dong et al., 2013)

**Table S6.** The subgroup distribution of CDS haplotypes (gcHaps).

|       | Hap1 | Hap2 | Hap3 | Hap4 | Hap5 | Hap6 | Hap7 | Hap8 | Hap9 | Hap10 | Hap11 |
|-------|------|------|------|------|------|------|------|------|------|-------|-------|
| Aus   | 2    | 2    | 3    | 0    | 0    | 79   | 0    | 75   | 0    | 0     | 21    |
| Bas   | 64   | 0    | 3    | 0    | 0    | 1    | 1    | 0    | 0    | 0     | 1     |
| Adm   | 29   | 9    | 10   | 2    | 4    | 7    | 3    | 2    | 1    | 0     | 3     |
| XI    | 53   | 483  | 457  | 170  | 160  | 38   | 113  | 30   | 50   | 39    | 8     |
| GJ    | 806  | 11   | 9    | 0    | 1    | 0    | 1    | 0    | 0    | 0     | 0     |
| total | 954  | 505  | 482  | 172  | 165  | 125  | 118  | 107  | 51   | 39    | 33    |

**Table S7.** The subgroup distribution of 1-kb promoter haplotypes (gpHaps).

|       | Hap1 | Hap2 | Hap3 | Hap4 | Hap5 | Hap6 | Hap7 | Hap8 | Hap9 | Hap10 | Hap11 |
|-------|------|------|------|------|------|------|------|------|------|-------|-------|
| Aus   | 54   | 0    | 24   | 0    | 0    | 16   | 0    | 0    | 0    | 0     | 1     |
| Bas   | 0    | 40   | 1    | 0    | 0    | 1    | 1    | 0    | 0    | 0     | 0     |
| Adm   | 13   | 10   | 2    | 1    | 4    | 6    | 4    | 2    | 1    | 0     | 4     |
| XI    | 332  | 4    | 139  | 25   | 126  | 99   | 1    | 56   | 43   | 39    | 0     |
| GJ    | 8    | 324  | 1    | 116  | 1    | 3    | 101  | 0    | 0    | 0     | 26    |
| total | 407  | 378  | 167  | 142  | 131  | 125  | 107  | 58   | 44   | 39    | 31    |

**Table S8.** Likelihood ratio test statistic and parameters estimated from the M0 and mF Models in PAML.

| Model | np  | InL         | Parameters          | Models Compared | 2 $\Delta$ L | p-Value |
|-------|-----|-------------|---------------------|-----------------|--------------|---------|
| M0    | 84  | -60962.0886 | $\omega_0=0.0935$   | M0 vs. Mf       | 50.3174      | <0.001  |
| Mf    | 165 | -60253.4181 | $\omega_1=2.7397$ * |                 |              |         |

\* Branch of H2
