# Supplementary material for: RNA-Seq Transcriptome Analysis and Evolution of OsEBS, a Gene Involved in Enhanced Spikelet Number per Panicle in Rice
Source: Int J Mol Sci. 2023 Jun 18;24(12):10303. doi: 10.3390/ijms241210303 (PMC10299296; doi:10.3390/ijms241210303)
Supplement: Supplementary file 1 [file ijms-24-10303-s001.zip]

Archive with 4 entries (4 files):
- Figure S1-S2 and S5-S6.pdf
- Figure S3.pdf
- Figure S4.pptx
- Table S1-S8.pdf
